# Supplementary material for: Nest Size Matters: Common Cuckoos Prefer to Parasitize Larger Nests of Oriental Reed Warblers
Source: Research Square preprint supplement (doi:10.21203/rs.3.rs-204677/v1), 2021-02-18
Supplement: Supplementary file 1 [file 73c1aa6fa448773c368820f0.xlsx]

## Sheet: Sheet1
Group 1	Nest ID	Large nest	Small nest		Group 2	Nest ID	Large nest	Medium nest	Small nest		Quail eggs
	1	85.78	65.29			1	77.74	50.61	34.61		ID	Length (mm)	Width (mm)	Weight（g）
	2	86.79	66.89			2	84.78	61.34	41.36		1	38.81	25.95	12
	3	84.43	67.7			3	75.39	61.2	41.2		2	31.59	24.18	9.6
	4	85.41	67.07			4	81.75	58.83	38.83		3	33.04	23.87	9.8
	5	86.56	68.67			5	73.47	58.43	38.47		4	29.47	24.39	9.4
	6	85.89	66.06			6	86.14	64.24	44.66		5	32.45	25.06	11.1
	7	84.32	67.54			7	76.44	51.95	31.94		6	33.92	23.96	9.9
	8	87.78	67.8			8	76.15	55.06	35.05		7	33.92	25.1	10.3
	9	88.34	69.45			9	78.61	58.61	38.69		8	33.46	25.39	11.6
	10	86.29	66.56			10	81.34	61.34	41.39		9	29.83	24.3	9.3
	11	85.9	67.39			11	77.67	57.67	37.65		10	34.79	24.33	10.4
	12	87.54	69.22			12	79.58	59.58	39.88		11	33.29	26	11.6
	13	86.03	68.56			13	80.25	60.66	40.63		12	32.82	24.33	10.2
	14	84.94	69.48			14	81.54	60.84	40.89		13	32.38	24.15	9.3
	15	85.67	68.87			15	68.09	48.09	38.29		14	31.99	24.81	10.3
	16	85.59	65.84			16	69.49	49.49	39.49		15	31.62	23.58	9.4
	17	86.54	68.66			17	85.86	65.86	45.86
	18	86.28	67.35			18	78.32	57.34	37.38
	19	85.97	68.35			19	84.79	65.72	45.72
	20	86.19	67.25			20	77.91	45.94	35.94
	21	86.44	66.85			21	80.31	60.36	40.36
	22	86.47	67.21			22	82.77	62.88	42.88
	23	87.58	67.52			23	74.27	54.63	34.63
	24	85.98	67.39			24	73.81	52.64	32.66
	25	85.29	68.49			25	75.91	56.51	36.53
	26	87.21	67.38			26	82.43	62.59	42.52
	27	87.29	65.84			27	83.14	62.52	42.59
	28	86.53	66.68			28	79.62	59.88	39.84
	29	86.64	67.19			29	79.98	59.68	39.27
	30	86.75	68.65			30	77.38	55.68	37.68
	31	87.49	67.92			31	77.67	54.12	37.18
	32	87.26	67.47			32	73.83	53.83	36.83
	33	86.88	68.62			33	82.04	62.04	42.04
	34	87.51	67.83
	35	86.73	65.98
	36	86.76	67.33
